# Supplementary material
Source: PubMed Central journal article supplement (PMC2655246)

# Supplemental Figure 1

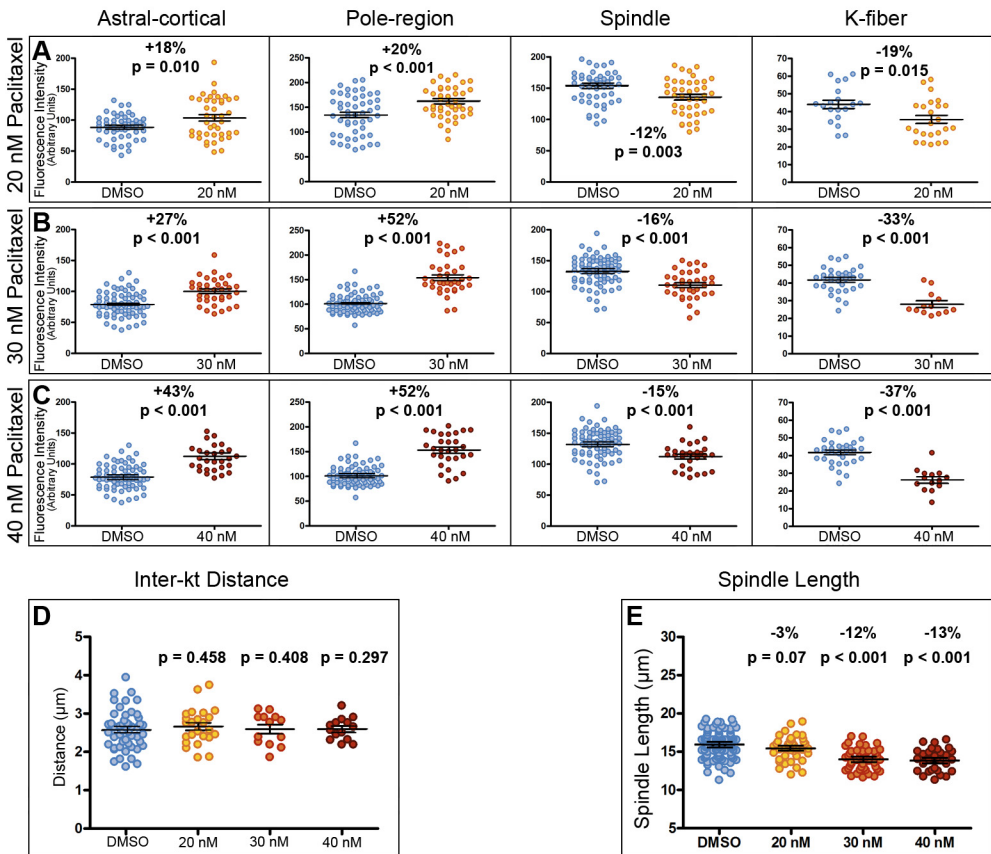

# Supplemental Figure 2

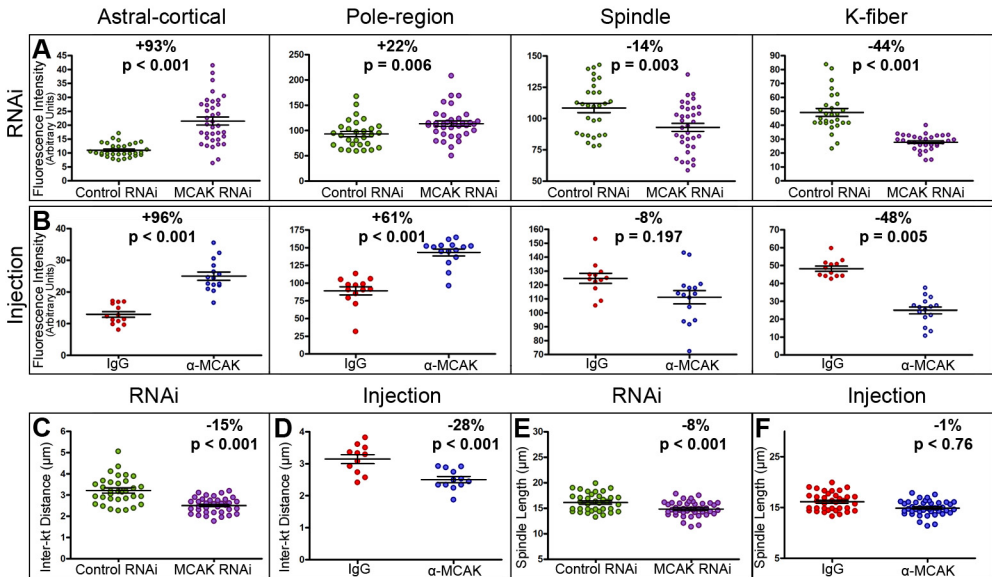

# Supplemental Figure 3

## A

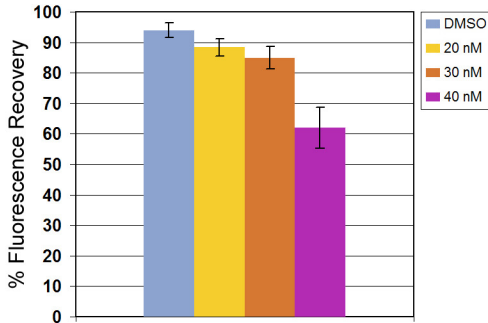

## B

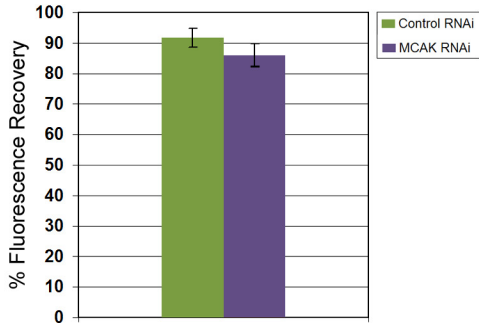

Supplement: E08-09-0985_1.pdf [file E08-09-0985_1.pdf]
